# 1 Investigating the Determinants of COVID-19 Vaccine Uptake 2 and Attitudes in Iraq: A Study Unveiling the Negative Impact 3 of Misinformation and Vaccine Conspiracy

4 **Malik Sallam,<sup>1,2</sup> Nariman Kareem,<sup>1</sup> and Mohammed Alkurtas<sup>3</sup>**

5 <sup>1</sup> Department of Pathology, Microbiology and Forensic Medicine, School of Medicine,  
6 The University of Jordan, Amman 11942, Jordan.

7 <sup>2</sup> Department of Clinical Laboratories and Forensic Medicine, Jordan University Hospital,  
8 Amman 11942, Jordan.

9 <sup>3</sup> Department of Pathology, Al-Kindy College of Medicine, University of Baghdad,  
10 Baghdad 00964, Iraq.

11 Correspondence should be addressed to Malik Sallam; [malik.sallam@ju.edu.jo](mailto:malik.sallam@ju.edu.jo)

## 12 **Abstract**

13 Vaccine hesitancy is a major barrier challenging the control of infectious diseases.  
14 Previous studies demonstrated high rates of COVID-19 vaccine hesitancy in the Middle  
15 East. The current study aimed to investigate the attitudes towards COVID-19 vaccination  
16 and COVID-19 vaccine uptake among the adult population in Iraq. This cross-sectional  
17 self-administered survey-based study was conducted in August–September 2022.  
18 Recruitment of possible participants was done using chain-referral sampling. The survey  
19 instrument assessed participants' demographics, attitudes toward COVID-19  
20 vaccination, beliefs in COVID-19 misinformation, vaccine conspiracy beliefs, and sources  
21 of information regarding the vaccine. The study sample comprised a total of 2544  
22 individuals, with the majority reporting the uptake of at least one dose of COVID-19  
23 vaccination (n=2226, 87.5%). Positive attitudes towards COVID-19 vaccination were  
24 expressed by the majority of participants (n=1966, 77.3%), while neutral attitudes were  
25 expressed by 345 participants (13.6%), and negative attitudes were expressed by 233  
26 participants (9.2%). Strong, moderate, slight, and absence of COVID-19 misinformation  
27 were expressed by 12.4%, 22.6%, 36.2%, and 28.7% participants, respectively. The  
28 majority of participants showed a neutral attitude towards COVID-19 vaccine  
29 conspiracies (n=1464, 57.5%), while 607 participants embraced these conspiracies  
30 (23.9%), and 473 disagreed with such beliefs (18.6%). In the multivariate analysis,  
31 factors associated with positive attitudes towards COVID-19 vaccination included  
32 disbelief in COVID-19 misinformation and disagreement with vaccine conspiracies.  
33 Higher COVID-19 vaccine uptake was significantly associated with history of COVID-19  
34 infection, higher income, residence outside the capital, disbelief in COVID-19  
35 misinformation, disagreement with vaccine conspiracies, and reliance on reputable  
36 information sources. COVID-19 vaccine coverage prevailed among the participants, with  
37 a majority having positive attitudes towards COVID-19 vaccination. Disbelief in COVID-  
38 19 misinformation and disagreement with vaccine conspiracies were correlated with  
39 positive vaccine attitudes and higher vaccine uptake. These insights can inform targeted  
40 interventions to enhance vaccination campaigns.

NOTE: This preprint reports new research that has not been certified by peer review and should not be used to guide clinical practice.

## 41 **Introduction**

42 Vaccination represents one of the greatest achievements of modern science, with  
43 resounding success in controlling the morbidity and mortality associated with infectious  
44 diseases.<sup>1-3</sup> The remarkable success that accompanied the advent of several effective and  
45 safe vaccines is manifested by the eradication of smallpox and the control of diseases such  
46 as measles and poliomyelitis.<sup>4</sup>

47 Despite the role of vaccination as a central measure in infectious disease prevention,  
48 vaccine hesitancy emerged as a threatening challenge undermining the success of  
49 vaccination.<sup>5</sup> Vaccine hesitancy, defined as the reluctance or rejection of vaccines despite  
50 their availability, has become a top threatening global health concern.<sup>6-8</sup> The issue of  
51 vaccine hesitancy emerged long before the emergence of the novel severe acute  
52 respiratory syndrome coronavirus 2 (SARS-CoV-2) and the subsequent coronavirus  
53 disease 2019 (COVID-19) pandemic.<sup>9-11</sup>

54 Previous studies indicated a wide range of factors linked with vaccination hesitancy,  
55 which is a place-, time-, and context-specific phenomenon.<sup>6, 12-14</sup> Nevertheless, the  
56 emergence of the COVID-19 pandemic exacerbated the issue of vaccine hesitancy.<sup>15, 16</sup>  
57 Unsubstantiated conspiracy theories, myths, and mis-/dis-information surrounding the  
58 virus, preventive measures, and COVID-19 vaccines fueled the phenomenon of COVID-19  
59 vaccine hesitancy, which was reported in various regions worldwide.<sup>16-18</sup> Thus, effective  
60 control of COVID-19 relies not only on the availability of effective and safe vaccines, but  
61 extends to involve positive attitudes and behaviors towards vaccination as well.<sup>19</sup>

62 The COVID-19 pandemic resulted in a profound negative impact on varying levels. The  
63 development and distribution of vaccines emerged as a promising measure to mitigate  
64 the negative impact of this unprecedented pandemic.<sup>20, 21</sup> However, and as mentioned  
65 earlier, the success of COVID-19 vaccination campaigns extended beyond the issues of  
66 COVID-19 vaccine efficacy and safety, since attitudes towards COVID-19 vaccination  
67 played a major role in its uptake.<sup>22</sup>

68 The infiltration of conspiracy beliefs and misinformation regarding various infectious  
69 diseases and vaccines—including COVID-19— has recently been notable in Arab  
70 countries.<sup>23-25</sup> This included unsubstantiated claims which lacked credible scientific  
71 evidence. Examples of these false ideas include the idea that SARS-CoV-2 is a man-made  
72 virus, the claim that COVID-19 vaccination aimed to implant microchips for surveillance,  
73 and the idea that vaccination induces infertility to reduce the global population size.<sup>23, 26,</sup>  
74 <sup>27</sup> The association between these factors and adverse health behaviors has been  
75 documented in various settings, including the recurring pattern of a link between vaccine  
76 hesitancy and endorsement of these beliefs.<sup>27-29</sup>

77 Iraq, a Middle Eastern country, has a diverse population of over 41 million in 2021, and  
78 the country serves as a distinctive case study of a versatile society.<sup>30</sup> As of 18 October  
79 2023, Iraq reported 2,465,545 cumulative COVID-19 cases and 25,375 cumulative deaths.  
80 COVID-19 vaccination in Iraq started on 2 March 2021, with 19,557,364 vaccine doses  
81 administered, benefiting 11,332,925 individuals with at least one dose and 7,944,775  
82 individuals with a complete primary vaccination series as of 18 October 2023.<sup>31</sup> Four  
83 vaccine types—Pfizer/BioNTech, Oxford/AstraZeneca, Sinopharm, and Sputnik V—

84 received approval for use in the country.<sup>32</sup> Several early studies from Iraq showed  
85 varying attitudes towards COVID-19 vaccination and its associated determinants;  
86 nevertheless, the majority of these studies did not focus on the role of misinformation  
87 and vaccine conspiracies on COVID-19 vaccine uptake.<sup>33-40</sup>

88 Therefore, the objectives of the current study included the elucidation of possible factors  
89 that could be associated with higher COVID-19 vaccine uptake and positive attitudes  
90 towards the vaccine among the adult Iraqi population. Specifically, we aimed to assess  
91 the possible role of vaccine conspiracy beliefs and COVID-19 misinformation in shaping  
92 vaccination attitudes and behaviors. Given the scope of this issue, we aspire to provide  
93 novel clues into the role of medical-specific conspiracies on adverse health behaviors,  
94 potentially offering valuable contributions to collective attempts for successful  
95 vaccination campaigns.

## 96 **Materials and Methods**

### 97 **Study design**

98 This study employed a cross-sectional design, utilizing a self-administered online  
99 questionnaire as the data collection tool. Inclusion criteria were specified in the  
100 introductory section of the e-survey and encompassed the following: participants had to  
101 be Iraqi citizens, possess proficiency in the Arabic language, and be aged 18 years or  
102 older.

103 The survey distribution occurred during 5 August 2022–14 September 2022. The  
104 questionnaire was hosted in Google Forms, and the survey language was Arabic. The  
105 survey distribution was based on chain-referral sampling starting with the contacts of  
106 the authors from Iraq (N.K. and M.A.) using e-mails, the direct messaging application  
107 WhatsApp, and social media platforms (Facebook and Twitter). The participants were  
108 asked to share the survey with their contacts as well. The survey was anonymous, and no  
109 incentives were offered for participation. For those who consented to participate,  
110 response to all items was mandatory to eliminate item non-response bias.

111 The minimum sample size in the current study was estimated at 2401 participants.  
112 Calculation of the minimum sample size in this study was done using Epitools—  
113 Epidemiological Calculators, using the following assumptions: an estimated prevalence  
114 of 50%, the desired precision of estimate at 2%, and the Iraqi population size of about  
115 41,179,351 people in 2021.<sup>30, 41</sup>

### 116 **Survey instrument**

117 The survey instrument comprised seven sections as follows: First, an introductory  
118 section which provided a short explanation of the research and its aims stressing on the  
119 anonymity of the survey and the eligibility criteria, followed by the e-consent mandatory  
120 item: “Do you agree to participate in the study?”. If the respondent selected “No”, the  
121 survey was directed to “submit form” page.

122 Second, the socio-demographics section: Seven items were used to assess the socio-  
123 demographic characteristics of the participants as follows: (1) age (as a continuous

124 variable, and grouped during the analysis based on the median age of the participants  
125 into  $\leq 27$  years vs.  $> 27$  years); (2) sex (male vs. female); (3) occupational category  
126 (employed healthcare worker (HCW), employed non-HCW, unemployed, or  
127 university/college student); (4) governorate (the Capital Baghdad vs. outside the  
128 Capital); (5) educational level (high school or less vs. undergraduate vs. postgraduate);  
129 (6) monthly income of household ( $\leq 500,000$  Iraqi dinar (IQD) vs.  $> 500,000$  IQD). The  
130 classification was based on two times estimate of the minimum wage in the country  
131 ( $500,000$  IQD  $\cong 342.55529$  US Dollars;<sup>42, 43</sup> and (7) history of chronic diseases (e.g.,  
132 diabetes mellitus, hypertension, heart, or renal disease) with yes vs. no as the possible  
133 answers.

134 Third, a section on COVID-19 history of infection and COVID-19 vaccine uptake: Five  
135 items were used as follows: (1) “Have you been diagnosed with COVID-19?” (yes vs. no);  
136 (2) for the respondents who answered the previous question with “yes”, the question  
137 “How many times have you been diagnosed with COVID-19?” followed; (3) “Have you  
138 received COVID-19 vaccination” (yes vs. no); (4) for the respondents who answered the  
139 previous question with “yes”, the question “Which type of COVID-19 vaccines have you  
140 received?” followed with the following choices: the US-based Pfizer-BioNTech COVID-19  
141 Vaccine, the UK-based Oxford–AstraZeneca COVID-19 vaccine, the China-based  
142 Sinopharm BBIBP vaccine, the Russia-based Sputnik V vaccine, other types of vaccines  
143 and more than one type of vaccine; and (5) “How many doses of COVID-19 vaccines have  
144 you received?”

145 Fourth, a section on the attitude of the participants towards COVID-19 vaccination,  
146 comprised the following question: “In your personal opinion, how would you rate the  
147 importance of getting the vaccine to protect against COVID-19?”. The item was measured  
148 on a 5-point Likert scale: very important, important, neutral/no opinion, not important,  
149 and not important at all. These responses were subsequently categorized into three  
150 distinct vaccination attitude groups as follows: positive attitude group comprising  
151 participants who indicated that COVID-19 vaccination was either “very important” or  
152 “important”, the neutral attitude group encompassing participants who answered  
153 “neutral/no opinion”, and the negative attitude group including participants who  
154 perceived COVID-19 vaccination as “not important” or “not important at all”.

155 Fifth, assessment of COVID-19 misinformation, with three items based on previous  
156 studies addressing COVID-19 vaccine hesitancy in the Middle East,<sup>27, 44</sup> as follows: (1)  
157 “What is your belief regarding the origin of SARS-CoV-2 in humans?” with options to  
158 choose “natural” (scored as 1) or “man-made” (scored as 2).; (2) “COVID-19 vaccine is a  
159 way to implant microchips into people as a control scheme” (with “yes” scored as 2 vs.  
160 “no” scored as 1); (3) “Getting COVID-19 vaccines will lead to infertility” (with “yes”  
161 scored as 2 vs. “no” scored as 1). The sum of the scores for the three items comprised the  
162 misinformation score which was subsequently classified into four categories as follows:  
163 a score of 3 indicated absence of belief in COVID-19 misinformation, a score of 4 indicated  
164 a slight belief in misinformation, a score of 5 indicated a moderate belief in  
165 misinformation, and a score of 6 indicating a strong belief in COVID-19 misinformation.

166 Sixth, assessment of the sources of COVID-19 vaccine information using the following  
167 item: “What is your single main source of information about COVID-19 vaccines?” with

168 the following options: Physicians, scientists and scientific journals vs. TV programs and  
169 newspapers vs. social media platforms.

170 Finally, the seventh section on the assessment of COVID-19 vaccine conspiracy beliefs:  
171 The conspiracy beliefs regarding COVID-19 vaccination was assessed using seven items  
172 based on the original vaccine conspiracy beliefs scale (VCBS) adopted from Shapiro *et al.*  
173 that was used previously in the assessment of COVID-19 vaccine hesitancy and influenza  
174 vaccine uptake.<sup>27, 45, 46</sup> The seven items were: (1) COVID-19 vaccine safety data are often  
175 fabricated; (2) people are deceived about the safety of COVID-19 vaccines (3)  
176 pharmaceutical companies cover up the dangers of COVID-19 vaccines; (4) COVID-19  
177 vaccine efficacy data are often fabricated; (5) people are deceived about the effectiveness  
178 of COVID-19 vaccines; (6) vaccination of children is harmful, and this fact is hidden from  
179 people; and (7) governments are trying to cover up the link between vaccines and other  
180 diseases, such as autism.<sup>27, 45</sup> The scale was assessed on a 7-point Likert scale as follows:  
181 strongly disagree (scored as 1), disagree (scored as 2), somewhat disagree (scored as 3),  
182 neutral/no opinion (scored as 4), somewhat agree (scored as 5), agree (scored as 6) and  
183 strongly agree (scored as 7). The Cronbach  $\alpha$  value for the VCBS was 0.893 indicating the  
184 acceptable internal consistency of the scale. The VCBS score could range between 7 and  
185 49, with higher scores indicating the embrace of vaccine conspiracy beliefs. The VCBS was  
186 then classified into three categories as follows: VCBS: 7–20 (disagreement with vaccine  
187 conspiracies), VCBS: 21–35 (neutral), and VCBS: 36–49 (agreement with vaccine  
188 conspiracies).

### 189 **Ethical approval**

190 The current study was approved by the Scientific and Ethical Unit at Al-Kindy College of  
191 Medicine, University of Baghdad (approved by the Council of Al-Kindy College of  
192 Medicine in session No. 20, date: 6 July 2022 under no specific reference number).

193 An electronic informed consent was required for successful completion of the survey by  
194 the inclusion of an introductory mandatory item asking the participants to approve their  
195 participation in the survey.

### 196 **Statistical analysis**

197 Data and statistical analyses were conducted using BM SPSS v26.0 for Windows (Armonk,  
198 NY, USA: IBM Corp.). Univariate analyses were conducted employing the chi-squared ( $\chi^2$ )  
199 test. Associations with a significance level of  $p < .100$  in univariate analyses were  
200 considered for inclusion in the subsequent multivariate analysis. Multivariate analysis  
201 was conducted using multinomial logistic regression. The Nagelkerke  $R^2$  statistic was  
202 employed to assess the variance explained by the model. A significance threshold of  
203  $p < .050$  was applied to determine statistical significance.

204

205

## 206 Results

### 207 Study sample characteristics

208 The study sample comprised a total of 2544 individuals. Characteristics of the study  
209 sample are shown in (Table 1).

210 **Table 1. General characteristics of the study sample (N=2544).**

| Variable                                     | Category                          | N <sup>4</sup> (%) |
|----------------------------------------------|-----------------------------------|--------------------|
| Sex                                          | Male                              | 1230 (48.3)        |
|                                              | Female                            | 1314 (51.7)        |
| Age                                          | ≤ 27 years                        | 1218 (47.9)        |
|                                              | > 27 years                        | 1326 (52.1)        |
| Occupation                                   | HCW <sup>2</sup>                  | 262 (10.3)         |
|                                              | Employed (non-HCW)                | 1093 (43.0)        |
|                                              | Unemployed                        | 202 (7.9)          |
| Place of residence                           | Student                           | 987 (38.8)         |
|                                              | Baghdad                           | 1494 (58.7)        |
|                                              | Outside Baghdad                   | 1050 (41.3)        |
| Education                                    | High school or less               | 180 (7.1)          |
|                                              | Undergraduate                     | 1534 (60.3)        |
| Income                                       | Postgraduate                      | 830 (32.6)         |
|                                              | ≤ 500K IQD <sup>3</sup>           | 668 (26.3)         |
| History of chronic disease                   | > 500K IQD                        | 1876 (73.7)        |
|                                              | Yes                               | 381 (15.0)         |
| History of COVID-19 <sup>1</sup>             | No                                | 2163 (85.0)        |
|                                              | Confirmed infection               | 1526 (60.0)        |
| How many times the participant got COVID-19? | No history of confirmed infection | 1018 (40.0)        |
|                                              | 0                                 | 1018 (40.0)        |
|                                              | 1                                 | 876 (34.4)         |
|                                              | 2                                 | 490 (19.3)         |
|                                              | 3                                 | 135 (5.3)          |
| COVID-19 vaccine uptake                      | 4                                 | 25 (1.0)           |
|                                              | Yes                               | 2226 (87.5)        |
| Vaccine type received                        | No                                | 318 (12.5)         |
|                                              | Pfizer-BioNTech vaccine           | 1651 (74.2)        |
|                                              | Oxford/AstraZeneca vaccine        | 172 (7.7)          |
|                                              | Sinopharm BBIBP vaccine           | 343 (15.4)         |
|                                              | Others                            | 9 (0.4)            |
| Number of doses received                     | Mixed                             | 51 (2.3)           |
|                                              | 0                                 | 318 (12.5)         |
|                                              | 1                                 | 255 (10.0)         |
|                                              | 2                                 | 1800 (70.8)        |
|                                              | 3                                 | 166 (6.5)          |
|                                              | 4                                 | 5 (0.2)            |

211 <sup>1</sup> COVID-19: Coronavirus disease 2019; <sup>2</sup> HCW: Healthcare worker; <sup>3</sup> K IQD: 1000 Iraqi  
212 dinars; <sup>4</sup> N: Number

213 **Attitude Towards COVID-19 Vaccination, COVID-19 Vaccine Uptake and its**  
 214 **Associated Variables**

215 The overall attitude of the participants towards COVID-19 vaccination was mostly  
 216 positive (n=1966, 77.3%), while a neutral attitude was expressed by 345 participants  
 217 (13.6%), and negative attitude was expressed by 233 participants (9.2%).

218 Using univariate analysis, the following factors were associated with a positive attitude  
 219 towards COVID-19 vaccination: male sex, age > 27 years, being a HCW, postgraduate  
 220 education, and monthly income > 500K IQD (**Table 2**).

221

222 **Table 2. Variables associated with attitude to COVID-19 vaccination and COVID-19**  
 223 **vaccine uptake in univariate analysis.**

| Variable                         | Category                          | Attitude towards COVID-19 vaccination |               |                | p, $\chi^2$      | Self-reported history of COVID-19 vaccine uptake |            | p, $\chi^2$      |
|----------------------------------|-----------------------------------|---------------------------------------|---------------|----------------|------------------|--------------------------------------------------|------------|------------------|
|                                  |                                   | Positive N <sup>4</sup> (%)           | Neutral N (%) | Negative N (%) |                  | Yes N (%)                                        | No N (%)   |                  |
| Sex                              | Male                              | 991 (80.6)                            | 124 (10.1)    | 115 (9.3)      | <.001,<br>24.695 | 1092 (88.8)                                      | 138 (11.2) | .059,<br>3.570   |
|                                  | Female                            | 975 (74.2)                            | 221 (16.8)    | 118 (9.0)      |                  | 1134 (86.3)                                      | 180 (13.7) |                  |
| Age                              | ≤ 27 years                        | 898 (73.7)                            | 206 (16.9)    | 114 (9.4)      | <.001,<br>23.276 | 1069 (87.8)                                      | 149 (12.2) | .697,<br>0.152   |
|                                  | > 27 years                        | 1068 (80.5)                           | 139 (10.5)    | 119 (9.0)      |                  | 1157 (87.3)                                      | 169 (12.7) |                  |
| Occupation                       | HCW <sup>2</sup>                  | 222 (84.7)                            | 27 (10.3)     | 13 (5.0)       | <.001,<br>24.264 | 248 (94.7)                                       | 14 (5.3)   | .002,<br>14.561  |
|                                  | Employed (non-HCW)                | 869 (79.5)                            | 123 (11.3)    | 101 (9.2)      |                  | 940 (86.0)                                       | 153 (14.0) |                  |
|                                  | Unemployed                        | 151 (74.8)                            | 32 (15.8)     | 19 (9.4)       |                  | 176 (87.1)                                       | 26 (12.9)  |                  |
|                                  | Student                           | 724 (73.4)                            | 163 (16.5)    | 100 (10.1)     |                  | 862 (87.3)                                       | 125 (12.7) |                  |
| Place of residence               | Baghdad                           | 1141 (76.4)                           | 214 (14.3)    | 139 (9.3)      | .364,<br>2.022   | 1274 (85.3)                                      | 220 (14.7) | <.001,<br>16.392 |
|                                  | Outside Baghdad                   | 825 (78.6)                            | 131 (12.5)    | 94 (9.0)       |                  | 952 (90.7)                                       | 98 (9.3)   |                  |
| Education                        | High school or less               | 133 (73.9)                            | 30 (16.7)     | 17 (9.4)       | <.001,<br>25.358 | 149 (82.8)                                       | 31 (17.2)  | .135,<br>4.002   |
|                                  | Undergraduate                     | 1145 (74.6)                           | 240 (15.6)    | 149 (9.7)      |                  | 1346 (87.7)                                      | 188 (12.3) |                  |
|                                  | Postgraduate                      | 688 (82.9)                            | 75 (9.0)      | 67 (8.1)       |                  | 731 (88.1)                                       | 99 (11.9)  |                  |
| Income                           | ≤ 500K IQD <sup>3</sup>           | 481 (72.0)                            | 114 (17.1)    | 73 (10.9)      | .001,<br>14.561  | 557 (83.4)                                       | 111 (16.6) | <.001,<br>14.036 |
|                                  | > 500K IQD                        | 1485 (79.2)                           | 231 (12.3)    | 160 (8.5)      |                  | 1669 (89.0)                                      | 207 (11.0) |                  |
| History of chronic disease       | Yes                               | 292 (76.6)                            | 54 (14.2)     | 35 (9.2)       | .929,<br>0.148   | 340 (89.2)                                       | 41 (10.8)  | .266,<br>1.239   |
|                                  | No                                | 1674 (77.4)                           | 291 (13.5)    | 198 (9.2)      |                  | 1886 (87.2)                                      | 277 (12.8) |                  |
| History of COVID-19 <sup>1</sup> | Confirmed infection               | 1171 (76.7)                           | 218 (14.3)    | 137 (9.0)      | .415,<br>1.758   | 1362 (89.3)                                      | 164 (10.7) | .001,<br>10.714  |
|                                  | No history of confirmed infection | 795 (78.1)                            | 127 (12.5)    | 96 (9.4)       |                  | 864 (84.9)                                       | 154 (15.1) |                  |

224 <sup>1</sup> COVID-19: Coronavirus disease 2019; <sup>2</sup> HCW: Healthcare worker; <sup>3</sup> K IQD: 1000 Iraqi dinars; <sup>4</sup>  
 225 N: Number

226 The majority of participants reported uptake of at least a single dose of COVID-19  
227 vaccination (n=2226, 87.5%) while 318 participants had no self-reported history of  
228 COVID-19 vaccine uptake (12.5%). Using univariate analysis, the following factors were  
229 associated with COVID-19 vaccine uptake: being an HCW, residence outside the Capital,  
230 income > 500K IQD, and a history of confirmed COVID-19 infection (**Table 2**).

### 231 **The Belief in COVID-19 Misinformation and the Embrace of COVID-19 Vaccine** 232 **Conspiracy Beliefs**

233 Regarding the belief in COVID-19 misinformation, the complete absence of such beliefs  
234 was reported among 731 participants (28.7%), while a slight belief in misinformation  
235 was reported among 922 participants (36.2%). Moderate belief in misinformation was  
236 reported among 576 participants (22.6%), and the strong belief in COVID-19  
237 misinformation was observed among 315 participants (12.4%). For the attitude towards  
238 COVID-19 vaccine conspiracies, the majority of participants exhibited a neutral attitude  
239 (n=1464, 57.5%), with 607 participants showing the embrace of COVID-19 vaccine  
240 conspiracies (23.9%), and 473 showing disagreement with such beliefs (18.6%).

241 In univariate analysis, the strong belief in COVID-19 misinformation and the agreement  
242 with COVID-19 vaccine conspiracies were associated with both negative attitude to  
243 COVID-19 vaccination and less COVID-19 vaccine uptake (**Table 3**).

244 **Table 3. Association between attitude to vaccine conspiracies, COVID-19**  
245 **misinformation and attitude to COVID-19 vaccination/COVID-19 vaccination**  
246 **uptake in univariate analysis.**

| Variable                                                  | Category                                | Attitude towards COVID-19 vaccination |               |                | <i>p</i> , $\chi^2$ | COVID-19 vaccine uptake |            | <i>p</i> , $\chi^2$ |
|-----------------------------------------------------------|-----------------------------------------|---------------------------------------|---------------|----------------|---------------------|-------------------------|------------|---------------------|
|                                                           |                                         | Positive N <sup>4</sup> (%)           | Neutral N (%) | Negative N (%) |                     | Yes N (%)               | No N (%)   |                     |
| Misinformation score <sup>1</sup>                         | No belief in misinformation             | 665 (91.0)                            | 51 (7.0)      | 15 (2.1)       | <.001, 303.899      | 688 (94.1)              | 43 (5.9)   | <.001, 75.253       |
|                                                           | Slight belief in misinformation         | 767 (83.2)                            | 102 (11.1)    | 53 (5.7)       |                     | 820 (88.9)              | 102 (11.1) |                     |
|                                                           | Moderate belief in misinformation       | 381 (66.1)                            | 110 (19.1)    | 85 (14.8)      |                     | 475 (82.5)              | 101 (17.5) |                     |
|                                                           | Strong belief in misinformation         | 153 (48.6)                            | 82 (26)       | 80 (25.4)      |                     | 243 (77.1)              | 72 (22.9)  |                     |
| Attitude towards COVID-19 vaccine conspiracy <sup>2</sup> | Disagreement (VCBS <sup>3</sup> : 7-20) | 455 (96.2)                            | 11 (2.3)      | 7 (1.5)        | <.001, 346.968      | 452 (95.6)              | 21 (4.4)   | <.001, 96.532       |
|                                                           | Neutral (VCBS: 21-35)                   | 1168 (79.8)                           | 224 (15.3)    | 72 (4.9)       |                     | 1308 (89.3)             | 156 (10.7) |                     |
|                                                           | Agreement (VCBS: 36-49)                 | 343 (56.5)                            | 110 (18.1)    | 154 (25.4)     |                     | 466 (76.8)              | 141 (23.2) |                     |

247 <sup>1</sup> Misinformation score: Using three items to assess the belief in COVID-19 misinformation; <sup>2</sup>  
248 COVID-19: Coronavirus disease 2019; <sup>3</sup> VCBS: Vaccine conspiracy beliefs scale; <sup>4</sup> N: Number.

### 249 **Source of Information about COVID-19 Vaccines**

250 The main sources of information regarding COVID-19 vaccination included physicians,  
251 scientists, and scientific journals (n=1090, 42.8%), followed closely by social media



252 platforms (n=1040, 40.9%), and finally TV programs and newspapers (n=414, 16.3%).  
 253 The dependence on social media platforms was associated with both a negative attitude  
 254 to COVID-19 vaccination and less COVID-19 vaccine uptake (**Figure 1**).

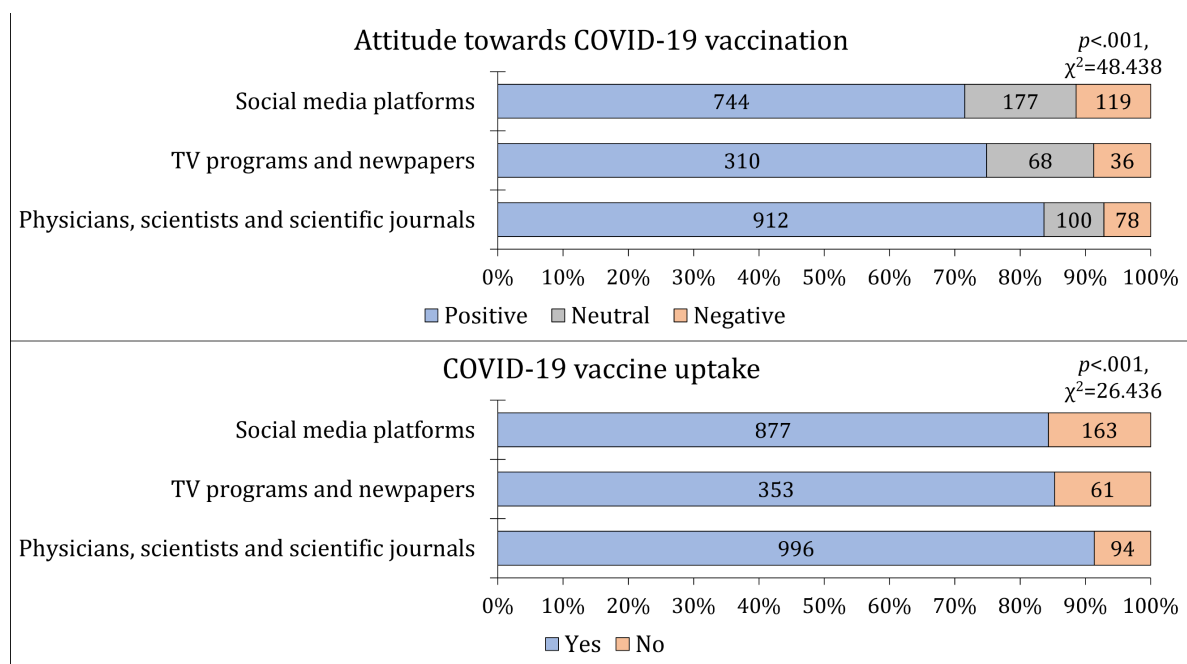

255  
 256 **Figure 1:** The association between attitude towards COVID-19 vaccination, COVID-19 vaccine uptake and  
 257 the main source of information regarding the vaccine. COVID-19: Coronavirus disease 2019.

258 **Multivariate analysis for factors associated with Positive Attitude towards COVID-**  
 259 **19 Vaccination**

260 The Nagelkerke  $R^2$  value of 0.245 indicated that the regression model explained 24.5% of  
 261 the variability observed in the data. For demographic variables, only males were  
 262 significantly less likely to have a neutral attitude compared to females, with an adjusted  
 263 odds ratio (aOR) of 0.64 (95% CI: 0.44–0.92,  $p=.016$ ).

264 Statistically significant associations were observed between belief in misinformation and  
 265 COVID-19 vaccine attitude. Participants with no belief in misinformation displayed a  
 266 significantly higher likelihood of a positive attitude, with an aOR of 7.82 (95% CI: 4.16–  
 267 14.68), while those with slight belief exhibited an aOR of 3.75 (95% CI: 2.46–5.71), and  
 268 those with moderate belief an aOR of 1.58 (95% CI: 1.07–2.31), all compared to strong  
 269 belief ( $p<.001$ , **Table 4**). Similarly, those who disagreed with COVID-19 vaccine  
 270 conspiracy beliefs (VCBS: 7–20) showed a higher likelihood of a positive attitude towards  
 271 COVID-19 vaccination, with an aOR of 10.42 (95% CI: 4.62–23.54), while those with a  
 272 neutral attitude (VCBS: 21–35) displayed an aOR of 4.57 (95% CI: 3.30–6.33), both  
 273 compared to those who endorsed vaccine conspiracies ( $p<.001$ , **Table 4**). Additionally,  
 274 participants with a neutral vaccine conspiracy attitude (VCBS: 21–35) displayed a higher  
 275 likelihood of a neutral attitude towards COVID-19 vaccination, with an aOR of 4.02 (95%  
 276 CI: 2.73–5.92), compared to those who endorsed vaccine conspiracies ( $p<.001$ , **Table 4**).

277

278  
279

**Table 4. Variables associated with attitude to COVID-19 vaccination in multinomial logistic regression analyses.**

| Model                                                                       | Nagelkerke R <sup>2</sup> = .245               | aOR <sup>6</sup> (95% CI <sup>7</sup> ) | p value         |
|-----------------------------------------------------------------------------|------------------------------------------------|-----------------------------------------|-----------------|
| <b>Positive attitude vs. negative attitude towards COVID-19 vaccination</b> |                                                |                                         |                 |
| Sex                                                                         | Male                                           | 0.99 (0.73–1.35)                        | .951            |
|                                                                             | Female                                         | Ref.                                    | .               |
| Age                                                                         | ≤ 27 years                                     | 0.93 (0.60–1.45)                        | .763            |
|                                                                             | > 27 years                                     | Ref.                                    | .               |
| Occupation                                                                  | HCW <sup>3</sup>                               | 1.52 (0.77–2.98)                        | .229            |
|                                                                             | Employed (non-HCW)                             | 1.04 (0.67–1.63)                        | .857            |
|                                                                             | Unemployed                                     | 1.03 (0.58–1.83)                        | .922            |
|                                                                             | Student                                        | Ref.                                    | .               |
| Education                                                                   | High school or less                            | 0.80 (0.42–1.54)                        | .506            |
|                                                                             | Undergraduate                                  | 0.74 (0.50–1.10)                        | .139            |
|                                                                             | Postgraduate                                   | Ref.                                    | .               |
| Income                                                                      | ≤ 500K IQD <sup>4</sup>                        | 1.03 (0.73–1.46)                        | .873            |
|                                                                             | > 500K IQD                                     | Ref.                                    | .               |
| Misinformation score <sup>1</sup>                                           | No belief in misinformation                    | 7.82 (4.16–14.68)                       | <b>&lt;.001</b> |
|                                                                             | Slight belief in misinformation                | 3.75 (2.46–5.71)                        | <b>&lt;.001</b> |
|                                                                             | Moderate belief in misinformation              | 1.58 (1.07–2.31)                        | <b>.020</b>     |
|                                                                             | Strong belief in misinformation                | Ref.                                    | .               |
| Attitude towards COVID-19 <sup>2</sup> vaccine conspiracy                   | Disagreement (VCBS <sup>5</sup> : 7–20)        | 10.42 (4.62–23.54)                      | <b>&lt;.001</b> |
|                                                                             | Neutral (VCBS: 21–35)                          | 4.57 (3.30–6.33)                        | <b>&lt;.001</b> |
|                                                                             | Agreement (VCBS: 36–49)                        | Ref.                                    | .               |
| Source of information regarding COVID-19 vaccination                        | Physicians, scientists and scientific journals | 1.26 (0.90–1.75)                        | .179            |
|                                                                             | TV programs and newspapers                     | 1.43 (0.93–2.19)                        | .105            |
|                                                                             | Social media platforms                         | Ref.                                    | .               |
| <b>Neutral attitude vs. negative attitude towards COVID-19 vaccination</b>  |                                                |                                         |                 |
| Sex                                                                         | Male                                           | 0.64 (0.44–0.92)                        | <b>.016</b>     |
|                                                                             | Female                                         | Ref.                                    | .               |
| Age                                                                         | ≤ 27 years                                     | 1.38 (0.83–2.31)                        | .217            |
|                                                                             | > 27 years                                     | Ref.                                    | .               |
| Occupation                                                                  | HCW                                            | 1.49 (0.69–3.21)                        | .314            |
|                                                                             | Employed (non-HCW)                             | 1.17 (0.69–1.96)                        | .562            |
|                                                                             | Unemployed                                     | 1.10 (0.57–2.11)                        | .774            |
|                                                                             | Student                                        | Ref.                                    | .               |
| Education                                                                   | High school or less                            | 1.31 (0.61–2.78)                        | .488            |
|                                                                             | Undergraduate                                  | 1.17 (0.73–1.87)                        | .512            |
|                                                                             | Postgraduate                                   | Ref.                                    | .               |
| Income                                                                      | ≤ 500K IQD <sup>3</sup>                        | 1.00 (0.68–1.49)                        | .987            |
|                                                                             | > 500K IQD                                     | Ref.                                    | .               |
| Misinformation score                                                        | No belief in misinformation                    | 1.74 (0.85–3.54)                        | .128            |
|                                                                             | Slight belief in misinformation                | 1.09 (0.67–1.78)                        | .730            |
|                                                                             | Moderate belief in misinformation              | 0.89 (0.57–1.39)                        | .613            |
|                                                                             | Strong belief in misinformation                | Ref.                                    | .               |
| Attitude towards COVID-19 vaccine conspiracy                                | Disagreement (VCBS <sup>3</sup> : 7–20)        | 1.71 (0.61–4.79)                        | .306            |
|                                                                             | Neutral (VCBS: 21–35)                          | 4.02 (2.73–5.92)                        | <b>&lt;.001</b> |
|                                                                             | Agreement (VCBS: 36–49)                        | Ref.                                    | .               |
| Source of information regarding COVID-19 vaccination                        | Physicians, scientists and scientific journals | 0.85 (0.57–1.26)                        | .415            |
|                                                                             | TV programs and newspapers                     | 1.38 (0.85–2.25)                        | .191            |
|                                                                             | Social media platforms                         | Ref.                                    | .               |

280 <sup>1</sup> Misinformation score: Using three items to assess the belief in COVID-19 misinformation; <sup>2</sup>  
281 COVID-19: Coronavirus disease 2019; <sup>3</sup> HCW: Healthcare worker; <sup>4</sup> K IQD: 1000 Iraqi dinars; <sup>5</sup>  
282 VCBS: Vaccine conspiracy beliefs scale; <sup>6</sup> aOR: Adjusted odds ratio; <sup>7</sup> CI: Confidence interval.

283

## 284 Multivariate Analysis for the Factors Associated with COVID-19 Vaccine Uptake

285 The Nagelkerke  $R^2$  of 0.128 showed that the regression model explained 12.8% of the  
 286 variability observed in the data. Participants residing in Baghdad were less likely to have  
 287 received the COVID-19 vaccine, as indicated by an aOR of 0.56 (95% CI: 0.43–0.73,  $p < .001$ ,  
 288 **Table 5**), compared to those residing outside Baghdad. Employed individuals in non-  
 289 healthcare roles were significantly less likely to have received the COVID-19 vaccine, with  
 290 an aOR of 0.70 (95% CI: 0.52–0.93,  $p = .015$ , **Table 5**) compared to university/college  
 291 students. Individuals with a history of COVID-19 infection showed higher rates of COVID-  
 292 19 vaccine uptake, with an aOR of 1.53 (95% CI: 1.19–1.97,  $p = .001$ , **Table 5**). Additionally,  
 293 participants with an income of  $\leq 500K$  IQD showed less likelihood of COVID-19 vaccine  
 294 uptake, with an aOR of 0.66 (95% CI: 0.50–0.88), compared to those with incomes  
 295 exceeding 500K IQD ( $p = .004$ , **Table 5**).

296 **Table 5. Variables associated with COVID-19 vaccine uptake in multinomial**  
 297 **logistic regression analyses.**

| Model                                                                 | Nagelkerke $R^2 = .128$                        | aOR <sup>6</sup> (95% CI <sup>7</sup> ) | $p$ value       |
|-----------------------------------------------------------------------|------------------------------------------------|-----------------------------------------|-----------------|
| <b>COVID-19 vaccine uptake vs. no history of COVID-19 vaccination</b> |                                                |                                         |                 |
| Sex                                                                   | Male                                           | 1.27 (0.97–1.64)                        | .079            |
|                                                                       | Female                                         | Ref.                                    | .               |
| Place of residence                                                    | Baghdad                                        | 0.56 (0.43–0.73)                        | <b>&lt;.001</b> |
|                                                                       | Outside Baghdad                                | Ref.                                    | .               |
| Occupation                                                            | HCW <sup>3</sup>                               | 1.69 (0.93–3.07)                        | 0.083           |
|                                                                       | Employed (non-HCW)                             | 0.70 (0.52–0.93)                        | <b>0.015</b>    |
|                                                                       | Unemployed                                     | 1.00 (0.62–1.60)                        | 0.985           |
|                                                                       | Student                                        | Ref.                                    | .               |
| History of COVID-19                                                   | Yes                                            | 1.53 (1.19–1.97)                        | <b>0.001</b>    |
|                                                                       | No                                             | Ref.                                    | .               |
| Income                                                                | $\leq 500K$ IQD <sup>4</sup>                   | 0.66 (0.50–0.88)                        | <b>0.004</b>    |
|                                                                       | $> 500K$ IQD                                   | Ref.                                    | .               |
| Misinformation score <sup>1</sup>                                     | No belief in misinformation                    | 2.29 (1.45–3.61)                        | <b>&lt;.001</b> |
|                                                                       | Slight belief in misinformation                | 1.49 (1.04–2.15)                        | <b>0.031</b>    |
|                                                                       | Moderate belief in misinformation              | 1.08 (0.75–1.54)                        | 0.687           |
|                                                                       | Strong belief in misinformation                | Ref.                                    | .               |
| Attitude towards COVID-19 <sup>2</sup> vaccine conspiracy             | Disagreement (VCBS <sup>5</sup> : 7–20)        | 3.65 (2.16–6.18)                        | <b>&lt;.001</b> |
|                                                                       | Neutral (VCBS: 21–35)                          | 2.06 (1.56–2.71)                        | <b>&lt;.001</b> |
|                                                                       | Agreement (VCBS: 36–49)                        | Ref.                                    | .               |
| Source of information regarding COVID-19 vaccination                  | Physicians, scientists and scientific journals | 1.46 (1.10–1.94)                        | <b>0.009</b>    |
|                                                                       | TV programs and newspapers                     | 1.13 (0.81–1.58)                        | 0.469           |
|                                                                       | Social media platforms                         | Ref.                                    | .               |

298 <sup>1</sup> Misinformation score: Using three items to assess the belief in COVID-19 misinformation; <sup>2</sup>  
 299 COVID-19: Coronavirus disease 2019; <sup>3</sup> HCW: Healthcare worker; <sup>4</sup> K IQD: 1000 Iraqi dinars; <sup>5</sup>  
 300 VCBS: Vaccine conspiracy beliefs scale; <sup>6</sup> aOR: Adjusted odds ratio; <sup>7</sup> CI: Confidence interval.

301 Moreover, participants who reported no belief in COVID-19 misinformation exhibited a  
 302 significantly higher likelihood of COVID-19 vaccine uptake, reflected in an aOR of 2.29  
 303 (95% CI: 1.45–3.61) compared to those with strong beliefs in misinformation ( $p < .001$ ).  
 304 Also, participants with a slight belief in misinformation demonstrated a higher likelihood  
 305 of COVID-19 vaccine uptake, with an aOR of 1.49 (95% CI: 1.04–2.15,  $p = .031$ , **Table 5**). A

306 higher likelihood of COVID-19 vaccine uptake was observed among the participants who  
307 disagreed with COVID-19 vaccine conspiracy beliefs (VCBS: 7–20) reflected by an aOR of  
308 3.65 (95% CI: 2.16–6.18), and among participants with neutral attitude towards vaccine  
309 conspiracies (VCBS: 21–35) with an aOR of 2.06 (95% CI: 1.56–2.71) compared to those  
310 who endorsed vaccine conspiracies ( $p<.001$  for both comparisons, **Table 5**). Finally,  
311 participants who relied on physicians, scientists, and scientific journals as their source of  
312 information regarding COVID-19 vaccination exhibited a significantly increased  
313 likelihood of COVID-19 vaccine uptake, as indicated by an aOR of 1.46 (95% CI: 1.10–1.94,  
314  $p=.009$ , **Table 5**) compared to those who relied on social media platforms.

## 315 **Discussion**

316 The current study revealed a clear distinct pattern in the possible factors influencing  
317 COVID-19 vaccination attitudes and uptake. Notably, lower vaccine uptake and negative  
318 attitudes towards the vaccine were significantly associated with endorsement of vaccine  
319 conspiracies and COVID-19 misinformation.

320 In comparison to the previous studies conducted in Iraq, the participants in the current  
321 study demonstrated a favorable attitude towards COVID-19 vaccination. For example, an  
322 earlier study by Ghazi *et al.* indicated that 77.6% of respondents were willing to take the  
323 vaccine when available, a rate almost the same of the current study findings which  
324 indicated that 77.3% displayed a positive attitude to COVID-19 vaccination.<sup>33</sup> Another  
325 Iraqi study in 2021 by Shareef *et al.* reported a lower acceptance rate of 56.2%.<sup>37</sup> On the  
326 other hand, Al-Qerem *et al.* conducted a survey study in July 2021 and found that 88.6%  
327 of respondents were willing to be vaccinated against COVID-19, with concerns about  
328 vaccine safety and the need for more information being the primary reasons for vaccine  
329 refusal.<sup>38</sup>

330 From a global perspective, the acceptance rate observed in our study is slightly higher  
331 than the global average of 65–75%, as indicated by recent systematic reviews.<sup>47, 48</sup>  
332 Despite the observed variability in the rates of COVID-19 vaccine acceptance which can  
333 be attributed to survey timing, phrasing of the items assessing vaccination hesitancy, and  
334 possible sampling bias, the common pattern in line with our findings is the generally  
335 positive attitude towards COVID-19 vaccination in Iraq.<sup>16, 37-39</sup>

336 A notable aspect of this study was the clear demonstration of the correlation between  
337 COVID-19 vaccine conspiracies, COVID-19 misinformation, and negative attitudes and  
338 behaviors towards COVID-19 vaccination. This manifested in significantly lower vaccine  
339 uptake and less favorable attitudes towards the vaccine. The government in Iraq has  
340 taken measures to combat such misinformation, emphasizing the importance of  
341 vaccination and warning against spreading false information.<sup>49, 50</sup>

342 The Iraqi government adopted a non-mandatory approach regarding COVID-19  
343 vaccination, refraining from imposing vaccine mandates due to the lack of legal support  
344 of such a measure.<sup>51</sup> Instead, the Iraqi Ministry of Health and Environment advocated for  
345 alternative public health strategies. In Iraq, employees were encouraged to voluntarily  
346 provide either a weekly COVID-19 testing card or a vaccination card as a prerequisite for  
347 work attendance without punishing measures against unvaccinated employees.<sup>51</sup> The  
348 Iraqi government also initiated vaccination campaigns to enhance COVID-19 vaccine

349 coverage, with comprehensive plans to augment vaccine supply and to expand  
350 vaccination facilities, with a particular focus on vaccinating HCWs to counter vaccine-  
351 related misinformation effectively.<sup>51, 52</sup>

352 The findings of the current study highlighted the significant association between  
353 conspiracy beliefs and negative health behavior manifested in lower COVID-19 vaccine  
354 uptake. Extensive evidence has consistently highlighted the widespread presence of  
355 medical conspiracy theories and their potential impact on various aspects of health-  
356 related behaviors, including the willingness to get vaccinated and actual vaccine  
357 uptake.<sup>27, 46, 53-57</sup> The adoption of conspiracy theories can exert a direct influence on  
358 individual engagement behaviors, including health-related practices.<sup>58-60</sup> For example,  
359 the detrimental impact of embracing COVID-19 conspiracy beliefs on compliance with  
360 government-imposed restrictions, adherence to preventive measures, and willingness to  
361 receive COVID-19 vaccination was shown in a study from the U.S. by Romer and  
362 Jamieson.<sup>61</sup> Similarly, research conducted in Finland by Pivetti *et al.* demonstrated that  
363 the endorsement of COVID-19 conspiracy beliefs was associated with lower support for  
364 pandemic-related governmental restrictions.<sup>62</sup> In the Arab countries of the Middle East,  
365 the COVID-19 vaccine conspiracies have been shown to be associated with higher rates  
366 of vaccine hesitancy/rejection.<sup>27, 44</sup>

367 In the current study, an interesting observation was the striking contrast in the  
368 determinants of participants' attitudes towards COVID-19 vaccination compared to their  
369 actual vaccine uptake. Notably, demographic variables appeared to play a minimal role  
370 in shaping attitudes, whereas several demographic variables were significantly  
371 correlated with actual vaccine uptake. This divergence between attitudes and behavior  
372 can be attributed to the inherent distinction between what people think or feel  
373 representing attitudes, and what they actually do manifested in behavior.<sup>63</sup> Attitudes  
374 often reflect abstract viewpoints and personal beliefs, while behavior could be influenced  
375 by a range of external factors, including governmental policies and societal  
376 expectations.<sup>64, 65</sup> Thus, it is conceivable that individuals may hold certain attitudes about  
377 vaccination but, when faced with practical circumstances, their behavior may align  
378 differently.

379 The major finding in this study was unveiling the significant association between vaccine  
380 conspiracy beliefs, misinformation, and negative attitudes towards COVID-19  
381 vaccination, as well as a reduced likelihood of vaccine uptake. Plausible explanations of  
382 this association could be based on previous and recent evidence highlighting the impact  
383 of conspiracies and misinformation on vaccination behavior.<sup>54, 66-68</sup> Conspiracy theories  
384 and misinformation have the potential to deter individuals from getting vaccinated  
385 through reducing vaccine confidence.<sup>18, 69</sup> Endorsing conspiracy beliefs can undermine  
386 the trust in healthcare systems, governmental agencies, and pharmaceutical  
387 companies.<sup>70, 71</sup> Trust is an essential aspect in the decision-making process of getting  
388 vaccinated.<sup>72, 73</sup> Hence, compromised trust could result in a negative attitudes towards  
389 vaccination due to fear among individuals that they are not being provided with accurate  
390 and safe preventive measures.<sup>74</sup>

391 Additionally, the current study results showed that the source of information could play  
392 an important role in COVID-19 vaccine uptake. Health misinformation often spreads  
393 through channels that may lack credibility, such as social media platforms.<sup>75-77</sup> When

394 individuals rely on social media for health information, they may inadvertently expose  
395 themselves to distorted views on vaccine safety and efficacy.<sup>78</sup> The current study results  
396 were consistent with this point of view by revealing that COVID-19 vaccine uptake was  
397 lower among those who relied on social media platforms compared to individuals who  
398 sought vaccine information from scientifically credible sources (e.g., physicians,  
399 scientists, etc.).

400 Besides the important roles of vaccine conspiracy beliefs and misinformation, it is worth  
401 mentioning other factors were linked to actual COVID-19 vaccine uptake in this study.  
402 These factors could offer useful insights into the complexity of the vaccine uptake as a  
403 health behavior. First, participants living outside of the capital, Baghdad exhibited higher  
404 COVID-19 vaccine uptake. This suggests that targeted efforts should be made to prioritize  
405 vaccination campaigns in the capital city of Iraq. Additionally, lower income was  
406 associated with lower COVID-19 vaccine uptake, which emphasizes the importance of  
407 addressing socio-economic disparities to ensure equitable access to COVID-19  
408 vaccination. Furthermore, the history of COVID-19 infection appeared to influence  
409 vaccination behavior, although the exact nature of this relationship is not discernible. It  
410 is possible that individuals who had experienced the disease may have been less  
411 complacent about vaccination due to their personal encounter with the disease. However,  
412 establishing a direct cause-and-effect relationship in this regard can be challenging and  
413 requires further investigation. Finally, in this study, university/college students, as a  
414 group, exhibited higher COVID-19 vaccination rates. This aligns with previous research  
415 and can be attributed to the view that students are generally more informed and engaged  
416 in health-related matters.<sup>44, 79</sup>

417 Lastly, it is essential to acknowledge the limitations of this study, which should be  
418 considered carefully in any attempt to generalize the results as follows: (1) The  
419 possibility of response bias should be considered with participants who chose to respond  
420 to the survey being not representative of the entire adult population in Iraq. Additionally,  
421 individuals with stronger opinions, whether positive or negative, about COVID-19  
422 vaccination might have been more motivated to participate in the study, resulting in  
423 response bias as well, with subsequent over- or under-estimation of COVID-19 vaccine  
424 hesitancy/resistance and misinformation levels. (2) The study employed a cross-  
425 sectional design, entailing the capturing of data at a single point of time, which is helpful  
426 for elucidating associations but cannot establish causality. Additionally, the data were  
427 collected at a specific time point, making it hard to draw definitive conclusions about the  
428 temporal trends in vaccination attitudes and behaviors. It is recommended to conduct  
429 longitudinal studies to establish causal relationships and to analyze the temporal trends.  
430 (3) The current study utilized the chain-referral sampling method to recruit participants,  
431 which is a non-random sampling method possibly introducing selection bias; therefore,  
432 the sample may not be fully representative of the broader adult Iraqi population. In  
433 addition, the study inevitably excluded certain groups, such as individuals without  
434 internet access or those who could not complete an online survey, further deepening the  
435 issue of possible selection bias. (4) The findings of this study may not be easily  
436 generalizable to other regions or countries with different cultural, social, or healthcare  
437 contexts, based on the attributes of vaccine hesitancy as a phenomenon. Subsequently,  
438 this could compromise the generalizability of the study results on the global level. (5)  
439 Social desirability bias should be considered since the participants might have provided  
440 what they believed as socially acceptable responses. This could have led to overreporting

441 positive attitudes towards vaccination and underreporting negative vaccination attitudes  
442 endorsing conspiracy beliefs.

## 443 **Conclusions**

444 In conclusion, this study aimed to provide a comprehensive assessment of the factors  
445 shaping attitudes and behaviors related to COVID-19 vaccination in Iraq. The findings of  
446 the current study could provide valuable insights into the interplay between COVID-19  
447 vaccine conspiracies, COVID-19 misinformation, and negative health attitudes and  
448 behaviors, which were manifested in lower COVID-19 vaccine uptake and unfavorable  
449 attitudes towards the vaccine.

450 These results emphasized the critical need for targeted interventions aiming to address  
451 misinformation and to enhance COVID-19 vaccine literacy. Engaging HCWs as advocates  
452 for vaccination can play a pivotal role in improving vaccine acceptance and uptake among  
453 the population, which was highlighted by their significant role as a source of information  
454 among participants who had higher rates of COVID-19 vaccine uptake. Furthermore,  
455 tailoring communication strategies to specific demographics and belief-based subgroups  
456 can be an important measure for effectively countering COVID-19 vaccine-related uptake  
457 challenges. Ultimately, the implementation of these strategies can contribute to the global  
458 effort to combat the COVID-19 pandemic by increasing vaccine acceptance and  
459 participation, ultimately resulting in a positive impact on global health.

460

## 461 **Data Availability**

462 The data presented in this study are available on request from the corresponding  
463 author (Malik Sallam).

## 464 **Conflicts of Interest**

465 The authors declare no conflict of interest.

## 466 **Funding Statement**

467 This research received no external funding.

## 468 **Acknowledgments**

469 None.

## 470 **Supplementary Materials**

471 None.

## 472 **References**

- 473 1. Greenwood B. The contribution of vaccination to global health: past, present and  
474 future. *Philos Trans R Soc Lond B Biol Sci* 2014; 369:20130433.  
475 doi:10.1098/rstb.2013.0433.
- 476 2. Rodrigues CMC, Plotkin SA. Impact of Vaccines; Health, Economic and Social  
477 Perspectives. *Front Microbiol* 2020; 11:1526. doi:10.3389/fmicb.2020.01526.
- 478 3. Toor J, Echeverria-Londono S, Li X, Abbas K, Carter ED, Clapham HE, et al. Lives  
479 saved with vaccination for 10 pathogens across 112 countries in a pre-COVID-19 world.  
480 *Elife* 2021; 10. doi:10.7554/eLife.67635.
- 481 4. Kayser V, Ramzan I. Vaccines and vaccination: history and emerging issues. *Hum*  
482 *Vaccin Immunother* 2021; 17:5255-68. doi:10.1080/21645515.2021.1977057.
- 483 5. Larson HJ, Gakidou E, Murray CJL. The Vaccine-Hesitant Moment. *N Engl J Med*  
484 2022; 387:58-65. doi:10.1056/NEJMra2106441.
- 485 6. MacDonald NE. Vaccine hesitancy: Definition, scope and determinants. *Vaccine*  
486 2015; 33:4161-4. doi:10.1016/j.vaccine.2015.04.036.
- 487 7. Peretti-Watel P, Larson HJ, Ward JK, Schulz WS, Verger P. Vaccine hesitancy:  
488 clarifying a theoretical framework for an ambiguous notion. *PLoS Curr* 2015; 7.  
489 doi:10.1371/currents.outbreaks.6844c80ff9f5b273f34c91f71b7fc289.
- 490 8. Galagali PM, Kinikar AA, Kumar VS. Vaccine Hesitancy: Obstacles and Challenges.  
491 *Curr Pediatr Rep* 2022; 10:241-8. doi:10.1007/s40124-022-00278-9.
- 492 9. World Health Organization (WHO). Vaccine hesitancy: A growing challenge for  
493 immunization programmes. Available online: [https://www.who.int/news/item/18-08-](https://www.who.int/news/item/18-08-2015-vaccine-hesitancy-a-growing-challenge-for-immunization-programmes)  
494 [2015-vaccine-hesitancy-a-growing-challenge-for-immunization-programmes](https://www.who.int/news/item/18-08-2015-vaccine-hesitancy-a-growing-challenge-for-immunization-programmes) (accessed  
495 on 20 October 2023).
- 496 10. Poland GA, Jacobson RM. Understanding those who do not understand: a brief  
497 review of the anti-vaccine movement. *Vaccine* 2001; 19:2440-5. doi:10.1016/S0264-  
498 410X(00)00469-2.
- 499 11. Ramsay M, White J. MMR vaccine coverage falls after adverse publicity. *Commun*  
500 *Dis Rep CDR Wkly* 1998; 8:41, 4. doi:10.2807/esw.02.06.01260-en.
- 501 12. Larson HJ, Jarrett C, Eckersberger E, Smith DM, Paterson P. Understanding  
502 vaccine hesitancy around vaccines and vaccination from a global perspective: a  
503 systematic review of published literature, 2007-2012. *Vaccine* 2014; 32:2150-9.  
504 doi:10.1016/j.vaccine.2014.01.081.
- 505 13. Schmid P, Rauber D, Betsch C, Lidolt G, Denker ML. Barriers of Influenza  
506 Vaccination Intention and Behavior - A Systematic Review of Influenza Vaccine  
507 Hesitancy, 2005 - 2016. *PLoS One* 2017; 12:e0170550.  
508 doi:10.1371/journal.pone.0170550.
- 509 14. Dubé E, Gagnon D, Nickels E, Jeram S, Schuster M. Mapping vaccine hesitancy--  
510 country-specific characteristics of a global phenomenon. *Vaccine* 2014; 32:6649-54.  
511 doi:10.1016/j.vaccine.2014.09.039.
- 512 15. Wiysonge CS, Ndwandwe D, Ryan J, Jaca A, Batouré O, Anya BM, et al. Vaccine  
513 hesitancy in the era of COVID-19: could lessons from the past help in divining the  
514 future? *Hum Vaccin Immunother* 2022; 18:1-3. doi:10.1080/21645515.2021.1893062.
- 515 16. Sallam M. COVID-19 Vaccine Hesitancy Worldwide: A Concise Systematic Review  
516 of Vaccine Acceptance Rates. *Vaccines (Basel)* 2021; 9:160.  
517 doi:10.3390/vaccines9020160.



- 518 17. Sallam M, Al-Sanafi M, Sallam M. A Global Map of COVID-19 Vaccine Acceptance  
519 Rates per Country: An Updated Concise Narrative Review. *J Multidiscip Healthc* 2022;  
520 15:21-45. doi:10.2147/jmdh.S347669.
- 521 18. Ullah I, Khan KS, Tahir MJ, Ahmed A, Harapan H. Myths and conspiracy theories  
522 on vaccines and COVID-19: Potential effect on global vaccine refusals. *Vacunas* 2021;  
523 22:93-7. doi:10.1016/j.vacun.2021.01.001.
- 524 19. Greyling T, Rossouw S. Positive attitudes towards COVID-19 vaccines: A cross-  
525 country analysis. *PLoS One* 2022; 17:e0264994. doi:10.1371/journal.pone.0264994.
- 526 20. Kashte S, Gulbake A, El-Amin Iii SF, Gupta A. COVID-19 vaccines: rapid  
527 development, implications, challenges and future prospects. *Hum Cell* 2021; 34:711-33.  
528 doi:10.1007/s13577-021-00512-4.
- 529 21. Clemente-Suárez VJ, Navarro-Jiménez E, Moreno-Luna L, Saavedra-Serrano MC,  
530 Jimenez M, Simón JA, et al. The Impact of the COVID-19 Pandemic on Social, Health, and  
531 Economy. *Sustainability*, 2021:6314.
- 532 22. Motta M, Sylvester S, Callaghan T, Lunz-Trujillo K. Encouraging COVID-19  
533 Vaccine Uptake Through Effective Health Communication. *Frontiers in Political Science*  
534 2021; 3:630133. doi:10.3389/fpos.2021.630133.
- 535 23. Sallam M, Eid H, Awamleh N, Al-Tammemi AB, Barakat M, Athamneh RY, et al.  
536 Conspiratorial Attitude of the General Public in Jordan towards Emerging Virus  
537 Infections: A Cross-Sectional Study Amid the 2022 Monkeypox Outbreak. *Trop Med*  
538 *Infect Dis* 2022; 7. doi:10.3390/tropicalmed7120411.
- 539 24. Abdaljaleel M, Barakat M, Mahafzah A, Hallit R, Hallit S, Sallam M. TikTok Content  
540 on Measles-Rubella Vaccine in Jordan: A Cross-Sectional Study Highlighting the Spread  
541 of Vaccine Misinformation. *JMIR Preprints* 2023; Preprint.  
542 doi:10.2196/preprints.53458.
- 543 25. Al-Rawi A, Fakida A, Grounds K. Investigation of COVID-19 Misinformation in  
544 Arabic on Twitter: Content Analysis. *JMIR Infodemiology* 2022; 2:e37007.  
545 doi:10.2196/37007.
- 546 26. Sallam M, Dababseh D, Yaseen A, Al-Haidar A, Taim D, Eid H, et al. COVID-19  
547 misinformation: Mere harmless delusions or much more? A knowledge and attitude  
548 cross-sectional study among the general public residing in Jordan. *PLoS One* 2020;  
549 15:e0243264. doi:10.1371/journal.pone.0243264.
- 550 27. Sallam M, Dababseh D, Eid H, Al-Mahzoum K, Al-Haidar A, Taim D, et al. High  
551 Rates of COVID-19 Vaccine Hesitancy and Its Association with Conspiracy Beliefs: A  
552 Study in Jordan and Kuwait among Other Arab Countries. *Vaccines*, 2021:42.
- 553 28. Oliver JE, Wood T. Medical conspiracy theories and health behaviors in the  
554 United States. *JAMA Intern Med* 2014; 174:817-8.  
555 doi:10.1001/jamainternmed.2014.190.
- 556 29. Regazzi L, Lontano A, Cadeddu C, Di Padova P, Rosano A. Conspiracy beliefs,  
557 COVID-19 vaccine uptake and adherence to public health interventions during the  
558 pandemic in Europe. *Eur J Public Health* 2023; 33:717-24.  
559 doi:10.1093/eurpub/ckad089.
- 560 30. Data Commons. Iraq: Country in Asia. Available online:  
561 [https://datacommons.org/place/country/IRQ?utm\\_medium=explore&mprop=count&](https://datacommons.org/place/country/IRQ?utm_medium=explore&mprop=count&opt=Person&hl=en)  
562 [opt=Person&hl=en](https://datacommons.org/place/country/IRQ?utm_medium=explore&mprop=count&opt=Person&hl=en) (accessed on 14 July 2022).
- 563 31. WHO Health Emergency Dashboard. WHO Health Emergency Dashboard. Iraq  
564 Situation. Available online: <https://covid19.who.int/region/emro/country/iq> (accessed  
565 on 21 October 2023).

- 566 32. VIPER Group COVID19 Vaccine Tracker Team. IRAQ: 4 Vaccines Approved for  
567 Use in Iraq. Available online: <https://covid19.trackvaccines.org/country/iraq/>  
568 (accessed on 21 October 2023).
- 569 33. Ghazi H, Taher T, Alfadhul S, Al-Mahmood S, Hassan S, Hamoudi T, et al.  
570 Acceptance Of Covid-19 Vaccine Among General Population In Iraq: Acceptance Of  
571 Covid-19 Vaccine Among General Population In Iraq. Iraqi National Journal of Medicine  
572 2021; 3:93-103. doi:n.a.; Available from:  
573 <https://www.iqnjm.com/index.php/homepage/article/view/45>.
- 574 34. Abdulah DM. Prevalence and correlates of COVID-19 vaccine hesitancy in the  
575 general public in Iraqi Kurdistan: A cross-sectional study. J Med Virol 2021; 93:6722-31.  
576 doi:10.1002/jmv.27255.
- 577 35. Alatrany SSJ, Falaiyah AM, Zuhairawi RHM, Ogden R, H ALSA, Alatrany ASS, et al.  
578 A cross-sectional analysis of the predictors of COVID-19 vaccine uptake and vaccine  
579 hesitancy in Iraq. PLoS One 2023; 18:e0282523. doi:10.1371/journal.pone.0282523.
- 580 36. Tahir Al, Ramadhan DS, Piro SS, Abdullah RY, Taha AA, Radha RH. COVID-19  
581 vaccine acceptance, hesitancy and refusal among Iraqi Kurdish population. Int J Health  
582 Sci (Qassim) 2022; 16:10-6.
- 583 37. Shareef LG, Fawzi Al-Hussainy A, Majeed Hameed S. COVID-19 vaccination  
584 hesitancy among Iraqi general population between beliefs and barriers: An  
585 observational study. F1000Res 2022; 11:334. doi:10.12688/f1000research.110545.2.
- 586 38. Al-Qerem W, Hammad A, Alsajri AH, Al-Hishma SW, Ling J, Mosleh R. COVID-19  
587 Vaccination Acceptance and Its Associated Factors Among the Iraqi Population: A Cross  
588 Sectional Study. Patient Prefer Adherence 2022; 16:307-19. doi:10.2147/ppa.S350917.
- 589 39. Darweesh O, Khatab N, Kheder R, Mohammed T, Faraj T, Ali S, et al. Assessment  
590 of COVID-19 vaccination among healthcare workers in Iraq; adverse effects and  
591 hesitancy. PLoS One 2022; 17:e0274526. doi:10.1371/journal.pone.0274526.
- 592 40. Luma AH, Haveen AH, Faiq BB, Stefania M, Leonardo EG. Hesitancy towards  
593 Covid-19 vaccination among the healthcare workers in Iraqi Kurdistan. Public Health  
594 Pract (Oxf) 2022; 3:100222. doi:10.1016/j.puhp.2021.100222.
- 595 41. Epitools - Epidemiological Calculators. Sample size to estimate a simple  
596 proportion (apparent prevalence). Available online:  
597 <https://epitools.ausvet.com.au/oneproportion> (accessed on 14 July 2022).
- 598 42. Xe Currency Converter. Convert Iraqi Dinars to US Dollars: Xe Currency  
599 Converter. Available online:  
600 [https://www.xe.com/currencyconverter/convert/?Amount=500000&From=IQD&To=](https://www.xe.com/currencyconverter/convert/?Amount=500000&From=IQD&To=USD)  
601 [USD](https://www.xe.com/currencyconverter/convert/?Amount=500000&From=IQD&To=USD) (accessed on 26 November 2022).
- 602 43. Iraq Ministry of Finance. Payroll law (in Arabic). Available online:  
603 <http://www.mof.gov.iq/pages/ar/SalaryLaw.aspx> (accessed on 26 November 2022).
- 604 44. Sallam M, Dababseh D, Eid H, Hasan H, Taim D, Al-Mahzoum K, et al. Low COVID-  
605 19 Vaccine Acceptance Is Correlated with Conspiracy Beliefs among University Students  
606 in Jordan. International Journal of Environmental Research and Public Health,  
607 2021:2407.
- 608 45. Shapiro GK, Holding A, Perez S, Amsel R, Rosberger Z. Validation of the vaccine  
609 conspiracy beliefs scale. Papillomavirus Research 2016; 2:167-72.  
610 doi:10.1016/j.pvr.2016.09.001.
- 611 46. Sallam M, Ghazy RM, Al-Salahat K, Al-Mahzoum K, AlHadidi NM, Eid H, et al. The  
612 Role of Psychological Factors and Vaccine Conspiracy Beliefs in Influenza Vaccine  
613 Hesitancy and Uptake among Jordanian Healthcare Workers during the COVID-19  
614 Pandemic. Vaccines, 2022:1355.

- 615 47. Norhayati MN, Che Yusof R, Azman YM. Systematic Review and Meta-Analysis of  
616 COVID-19 Vaccination Acceptance. *Front Med (Lausanne)* 2021; 8:783982.  
617 doi:10.3389/fmed.2021.783982.
- 618 48. Fajar JK, Sallam M, Soegiarto G, Sugiri YJ, Anshory M, Wulandari L, et al. Global  
619 Prevalence and Potential Influencing Factors of COVID-19 Vaccination Hesitancy: A  
620 Meta-Analysis. *Vaccines (Basel)* 2022; 10:1356. doi:10.3390/vaccines10081356.
- 621 49. Iraqi News Agency. [Health is taking measures against those who incite not to  
622 receive the vaccine] in Arabic. Available online: <https://www.ina.iq/132234--.html>  
623 (accessed on 21 October 2023).
- 624 50. Iraqi News Agency. [The Ministry of Interior reveals its measures against those  
625 spreading rumors on social media] in Arabic. Available online:  
626 <https://www.ina.iq/132474--.html> (accessed on 21 October 2023).
- 627 51. Iraqi News Agency. [Health resolves the controversy over compulsory  
628 vaccination of employees and identifies the groups excluded from vaccination] in  
629 Arabic. Available online: <https://www.ina.iq/130053--.html> (accessed on 21 October  
630 2023).
- 631 52. WHO Regional Office for the Eastern Mediterranean, Sultany A, Sabaa B. Iraq  
632 launches nationwide vaccination campaign to scale up immunity against COVID-19.  
633 Available online: [https://www.emro.who.int/iraq/news/iraq-launches-nationwide-  
634 vaccination-campaign-to-scale-up-immunity-against-covid-19.html](https://www.emro.who.int/iraq/news/iraq-launches-nationwide-vaccination-campaign-to-scale-up-immunity-against-covid-19.html) (accessed on 21  
635 October 2023).
- 636 53. Ripp T, Röer JP. Systematic review on the association of COVID-19-related  
637 conspiracy belief with infection-preventive behavior and vaccination willingness. *BMC*  
638 *Psychology* 2022; 10:66. doi:10.1186/s40359-022-00771-2.
- 639 54. van Mulukom V, Pummerer LJ, Alper S, Bai H, Čavojová V, Farias J, et al.  
640 Antecedents and consequences of COVID-19 conspiracy beliefs: A systematic review.  
641 *Soc Sci Med* 2022; 301:114912. doi:10.1016/j.socscimed.2022.114912.
- 642 55. van Prooijen JW, Etienne TW, Kutiyiski Y, Krouwel APM. Conspiracy beliefs  
643 prospectively predict health behavior and well-being during a pandemic. *Psychol Med*  
644 2023; 53:2514-21. doi:10.1017/s0033291721004438.
- 645 56. Alsanafi M, Salim NA, Sallam M. Willingness to get HPV vaccination among female  
646 university students in Kuwait and its relation to vaccine conspiracy beliefs. *Hum Vaccin*  
647 *Immunother* 2023; 19:2194772. doi:10.1080/21645515.2023.2194772.
- 648 57. Kowalska-Duplaga K, Duplaga M. The association of conspiracy beliefs and the  
649 uptake of COVID-19 vaccination: a cross-sectional study. *BMC Public Health* 2023;  
650 23:672. doi:10.1186/s12889-023-15603-0.
- 651 58. van Prooijen JW, Douglas KM. Belief in conspiracy theories: Basic principles of an  
652 emerging research domain. *Eur J Soc Psychol* 2018; 48:897-908. doi:10.1002/ejsp.2530.
- 653 59. Douglas KM, Sutton RM, Cichocka A. The Psychology of Conspiracy Theories.  
654 *Current Directions in Psychological Science* 2017; 26:538-42.  
655 doi:10.1177/0963721417718261.
- 656 60. Bierwiazek K, Gundersen AB, Kunst JR. The role of conspiracy beliefs for  
657 COVID-19 health responses: A meta-analysis. *Curr Opin Psychol* 2022; 46:101346.  
658 doi:10.1016/j.copsyc.2022.101346.
- 659 61. Romer D, Jamieson KH. Conspiracy theories as barriers to controlling the spread  
660 of COVID-19 in the U.S. *Soc Sci Med* 2020; 263:113356.  
661 doi:10.1016/j.socscimed.2020.113356.
- 662 62. Pivetti M, Di Battista S, Paleari FG, Hakoköngäs E. Conspiracy beliefs and  
663 attitudes toward COVID-19 vaccinations: A conceptual replication study in Finland.

- 664 Journal of Pacific Rim Psychology 2021; 15:18344909211039893.  
665 doi:10.1177/18344909211039893.
- 666 63. Yuan Y, Sun R, Zuo J, Chen X. A New Explanation for the Attitude-Behavior  
667 Inconsistency Based on the Contextualized Attitude. *Behav Sci (Basel)* 2023; 13:223.  
668 doi:10.3390/bs13030223.
- 669 64. Ajzen I, Fishbein M. The Influence of Attitudes on Behavior. *The handbook of*  
670 *attitudes*. Mahwah, NJ, US: Lawrence Erlbaum Associates Publishers, 2005:173-221.
- 671 65. Ajzen I. The theory of planned behavior: Frequently asked questions. *Human*  
672 *Behavior and Emerging Technologies* 2020; 2:314-24. doi:10.1002/hbe2.195.
- 673 66. Bertin P, Nera K, Delouvée S. Conspiracy Beliefs, Rejection of Vaccination, and  
674 Support for hydroxychloroquine: A Conceptual Replication-Extension in the COVID-19  
675 Pandemic Context. *Front Psychol* 2020; 11:565128. doi:10.3389/fpsyg.2020.565128.
- 676 67. Altman JD, Miner DS, Lee AA, Asay AE, Nielson BU, Rose AM, et al. Factors  
677 Affecting Vaccine Attitudes Influenced by the COVID-19 Pandemic. *Vaccines (Basel)*  
678 2023; 11:516. doi:10.3390/vaccines11030516.
- 679 68. Loomba S, de Figueiredo A, Piatek SJ, de Graaf K, Larson HJ. Measuring the  
680 impact of COVID-19 vaccine misinformation on vaccination intent in the UK and USA.  
681 *Nat Hum Behav* 2021; 5:337-48. doi:10.1038/s41562-021-01056-1.
- 682 69. Jolley D, Douglas KM. The effects of anti-vaccine conspiracy theories on  
683 vaccination intentions. *PLoS One* 2014; 9:e89177. doi:10.1371/journal.pone.0089177.
- 684 70. Milošević Đorđević J, Mari S, Vdović M, Milošević A. Links between conspiracy  
685 beliefs, vaccine knowledge, and trust: Anti-vaccine behavior of Serbian adults. *Soc Sci*  
686 *Med* 2021; 277:113930. doi:10.1016/j.socscimed.2021.113930.
- 687 71. Bonetto E, Arciszewski T. The Creativity of Conspiracy Theories. *The Journal of*  
688 *Creative Behavior* 2021; 55:916-24. doi:10.1002/jocb.497.
- 689 72. Larson HJ, Clarke RM, Jarrett C, Eckersberger E, Levine Z, Schulz WS, et al.  
690 Measuring trust in vaccination: A systematic review. *Hum Vaccin Immunother* 2018;  
691 14:1599-609. doi:10.1080/21645515.2018.1459252.
- 692 73. Sapienza A, Falcone R. The Role of Trust in COVID-19 Vaccine Acceptance:  
693 Considerations from a Systematic Review. *Int J Environ Res Public Health* 2022; 20:665.  
694 doi:10.3390/ijerph20010665.
- 695 74. Seddig D, Maskileyson D, Davidov E, Ajzen I, Schmidt P. Correlates of COVID-19  
696 vaccination intentions: Attitudes, institutional trust, fear, conspiracy beliefs, and vaccine  
697 skepticism. *Soc Sci Med* 2022; 302:114981. doi:10.1016/j.socscimed.2022.114981.
- 698 75. Muhammed T S, Mathew SK. The disaster of misinformation: a review of  
699 research in social media. *International Journal of Data Science and Analytics* 2022;  
700 13:271-85. doi:10.1007/s41060-022-00311-6.
- 701 76. Pennycook G, Rand DG. The Psychology of Fake News. *Trends in Cognitive*  
702 *Sciences* 2021; 25:388-402. doi:10.1016/j.tics.2021.02.007.
- 703 77. Suarez-Lledo V, Alvarez-Galvez J. Prevalence of Health Misinformation on Social  
704 Media: Systematic Review. *J Med Internet Res* 2021; 23:e17187. doi:10.2196/17187.
- 705 78. Ngai CSB, Singh RG, Yao L. Impact of COVID-19 Vaccine Misinformation on Social  
706 Media Virality: Content Analysis of Message Themes and Writing Strategies. *J Med*  
707 *Internet Res* 2022; 24:e37806. doi:10.2196/37806.
- 708 79. Patrinely JR, Zakria D, Berkowitz ST, Johnson DB, Totten DJ. COVID-19: the  
709 Emerging Role of Medical Student Involvement. *Medical Science Educator* 2020;  
710 30:1641-3. doi:10.1007/s40670-020-01052-6.
